# Supplementary material
Source: PubMed Central journal article supplement (PMC10562840)
Supplement: mmc1.pdf [file mmc1.pdf]

# CHAT GPT- Friend or Foe

Dear all,

Chat GPT is an open AI tool that has created a buzz across the globe. This can have serious implications in clinical practice as well as research in medicine.

We would be grateful if you could spare few minutes to complete this anonymous survey questionnaire.

Thanks a lot for participating in this survey.

Mr (Prof) KP Iyengar  
Department of Orthopaedics  
Southport and Ormskirk NHS Trust  
Southport, UK

Dr (Prof) Rajesh Botchu  
Consultant Musculoskeletal Radiologist  
Royal Orthopedic Hospital, Birmingham, UK

Dr Arvind Nune  
Consultant Rheumatologist  
Southport and Ormskirk NHS Trust  
Southport, UK

**\* Required**

1. What is your place of work? \*

*Check all that apply.*

- District General Hospital
- University Teaching Hospital
- Private clinic
- Other

2. What is your specialty? \*

*Mark only one oval.*

- Radiologist
- Orthopaedic Surgeon
- Rheumatology
- Other

3. Have you heard about Chat GPT? \*

*Mark only one oval.*

- Yes
- No

4. Do you use Chat GPT?

*Mark only one oval.*

- Yes
- No

5. Will Chat GPT play a crucial role in medicine ?

*Mark only one oval.*

- Yes
- No
- May be

6. Will Chat GPT create radiology reports in future?

*Mark only one oval.*

- Yes
- No
- May be

7. Chat GPT will be involved in research as an anonymous co author in future.

*Mark only one oval.*

- Yes
- No
- May be

8. Will Chat GPT decrease the work force?

*Mark only one oval.*

- Yes
- No
- May be

9. Chat GPT will decrease the value of research.

*Mark only one oval.*

- True
- False

10. Chat GPT will enhance the quality of research.

*Mark only one oval.*

- Strongly disagree
- Disagree
- Neutral
- Agree
- Strongly agree

11. For any other comments, kindly answer below

---

---

---

---

---

---

This content is neither created nor endorsed by Google.

Google Forms
