# Supplementary material
Source: PubMed Central journal article supplement (PMC10562840)
Supplement: mmc2.pdf [file mmc2.pdf]

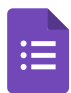

CHAT GPT-

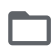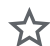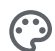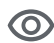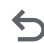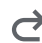

Send

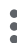

Questions

Responses

127

Settings

# CHAT GPT- Friend or Foe

Dear all,

Chat GPT is an open AI tool that has created a buzz across the globe. This can have serious implications on clinical practice as well as research in medicine.

We would be grateful if you could spare few minutes to complete this anonymous survey questionnaire.

Thanks a lot for participating in this survey.

Mr (Prof) KP Iyengar  
Department of Orthopaedics  
Southport and Ormskirk NHS Trust  
Southport, UK

Dr (Prof) Rajesh Botchu  
Consultant Musculoskeletal Radiologist  
Royal Orthopedic Hospital, Birmingham, UK

Dr Arvind Nune  
Consultant Rheumatologist  
Southport and Ormskirk NHS Trust  
Southport, UK

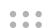

What is your place of work?

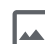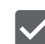

Checkboxes

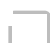

District General Hospital
